# Supplementary material for: Cardiac remodeling secondary to chronic volume overload is attenuated by a novel MMP9/2 blocking antibody
Source: PubMed Central journal article supplement (PMC7145114; doi:10.1371/journal.pone.0231202), 2020-04-09
Supplement: pone.0231202.s002.pdf [file pone.0231202.s002.pdf]

### **S1. Primer sequences used for RT-PCR**

MMP9: sense: CAGACGTGGGTCGATTCC  
antisense: TCATCGATCATGTCTCGC

MMP2: sense: ACGATGATGACCGGAAGT  
antisense: GTGTAGATCGGGGCCATC

The relative mRNA expression was normalized to the expression of the GAPDH  
reference gene:

GAPDH: sense: TGTGTCCGTCGTGGATCTGA  
antisense: TTGCTGTTGAAGTCGCAGGAG
